# Supplementary material
Source: HighWire-hosted journal article supplement (https://www.cmajopen.ca/highwire/filestream/81271/field_highwire_adjunct_files/0/2019-0010-original-submissoin.pdf)
Supplement: 2019-0010-original-submissoin.pdf [file 2019-0010-original-submissoin.pdf]

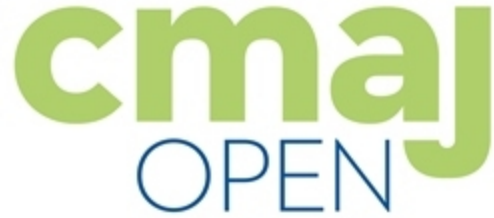

**Declarations of interest by members of Health Canada's  
Special Advisory Committees and Panels: A Descriptive  
Study**

|                               |                                                                                                                                                                                                                                                                                                                                                                                                                                                                                                                                                                                                                                                                                                                                                                                                                                                                                                                                                                                                                                                                                                                                                                                                                                                                                                                                                                                                                                                                                                                                                                                                                             |
|-------------------------------|-----------------------------------------------------------------------------------------------------------------------------------------------------------------------------------------------------------------------------------------------------------------------------------------------------------------------------------------------------------------------------------------------------------------------------------------------------------------------------------------------------------------------------------------------------------------------------------------------------------------------------------------------------------------------------------------------------------------------------------------------------------------------------------------------------------------------------------------------------------------------------------------------------------------------------------------------------------------------------------------------------------------------------------------------------------------------------------------------------------------------------------------------------------------------------------------------------------------------------------------------------------------------------------------------------------------------------------------------------------------------------------------------------------------------------------------------------------------------------------------------------------------------------------------------------------------------------------------------------------------------------|
| Journal:                      | <i>CMAJ Open</i>                                                                                                                                                                                                                                                                                                                                                                                                                                                                                                                                                                                                                                                                                                                                                                                                                                                                                                                                                                                                                                                                                                                                                                                                                                                                                                                                                                                                                                                                                                                                                                                                            |
| Manuscript ID                 | CMAJOpen-2019-0010                                                                                                                                                                                                                                                                                                                                                                                                                                                                                                                                                                                                                                                                                                                                                                                                                                                                                                                                                                                                                                                                                                                                                                                                                                                                                                                                                                                                                                                                                                                                                                                                          |
| Manuscript Type:              | Descriptive                                                                                                                                                                                                                                                                                                                                                                                                                                                                                                                                                                                                                                                                                                                                                                                                                                                                                                                                                                                                                                                                                                                                                                                                                                                                                                                                                                                                                                                                                                                                                                                                                 |
| Date Submitted by the Author: | 16-Jan-2019                                                                                                                                                                                                                                                                                                                                                                                                                                                                                                                                                                                                                                                                                                                                                                                                                                                                                                                                                                                                                                                                                                                                                                                                                                                                                                                                                                                                                                                                                                                                                                                                                 |
| Complete List of Authors:     | Lexchin, Joel; York University, School of Health Policy and Management;                                                                                                                                                                                                                                                                                                                                                                                                                                                                                                                                                                                                                                                                                                                                                                                                                                                                                                                                                                                                                                                                                                                                                                                                                                                                                                                                                                                                                                                                                                                                                     |
| More Detailed Keywords:       | expert committees, Health Canada, declaration of interest, pharmaceutical industry, transparency                                                                                                                                                                                                                                                                                                                                                                                                                                                                                                                                                                                                                                                                                                                                                                                                                                                                                                                                                                                                                                                                                                                                                                                                                                                                                                                                                                                                                                                                                                                            |
| Keywords:                     | Health policy                                                                                                                                                                                                                                                                                                                                                                                                                                                                                                                                                                                                                                                                                                                                                                                                                                                                                                                                                                                                                                                                                                                                                                                                                                                                                                                                                                                                                                                                                                                                                                                                               |
| Abstract:                     | <p><b>Background</b><br/>Health Canada supplements its in-house expertise on pharmacotherapy and pharmaceutical policy through the use of Scientific/Expert Advisory Committees (SAC) and Scientific/Expert Advisory Panels (SAP). This study was undertaken to examine the declared interests of Health Canada committee and panel members.</p> <p><b>Methods</b><br/>Observational study of the financial and intellectual interests of members of SACs and SAPs. The following information was extracted from Health Canada websites: name, name of committee/panel, direct, indirect and intellectual interests. Information extracted about the SAC/SAP included: number of meetings for which record of proceedings was available and topics discussed at meetings.</p> <p><b>Results</b><br/>There were three SACs and eight SAPs. Out of 99 people making declarations there were only 12 with a direct financial interest on 5 SACs/SAPs. Six of the 11 SACs/SAPs had a majority of members with an indirect financial interest and nine had a majority of members with an intellectual interest. SAC and SAP meetings rarely discussed individual products but recommendations from all but one of the meetings could potentially have affected the sales of medications.</p> <p><b>Interpretation</b><br/>Only a minority of members of committees and panels have direct financial interests but the majority of members on a majority of committees had indirect financial and intellectual interests. It was not possible to determine if financial or intellectual interests influenced voting patterns.</p> |

1  
2  
3  
4  
5  
6  
7  
8  
9  
10  
11  
12  
13  
14  
15  
16  
17  
18  
19  
20  
21  
22  
23  
24  
25  
26  
27  
28  
29  
30  
31  
32  
33  
34  
35  
36  
37  
38  
39  
40  
41  
42  
43  
44  
45  
46  
47  
48  
49  
50  
51  
52  
53  
54  
55  
56  
57  
58  
59  
60

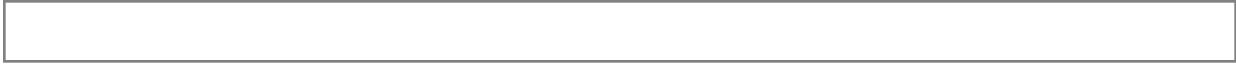

SCHOLARONE™  
Manuscripts

## STROBE Statement—checklist of items that should be included in reports of observational studies

|                              | Item No | Recommendation                                                                                                                                                                                                                                                                                                                                                                                                                                                         | Location in study     |
|------------------------------|---------|------------------------------------------------------------------------------------------------------------------------------------------------------------------------------------------------------------------------------------------------------------------------------------------------------------------------------------------------------------------------------------------------------------------------------------------------------------------------|-----------------------|
| <b>Title and abstract</b>    | 1       | (a) Indicate the study's design with a commonly used term in the title or the abstract                                                                                                                                                                                                                                                                                                                                                                                 | Title, page 1         |
|                              |         | (b) Provide in the abstract an informative and balanced summary of what was done and what was found                                                                                                                                                                                                                                                                                                                                                                    | Abstract, page 3      |
| <b>Introduction</b>          |         |                                                                                                                                                                                                                                                                                                                                                                                                                                                                        |                       |
| Background/rationale         | 2       | Explain the scientific background and rationale for the investigation being reported                                                                                                                                                                                                                                                                                                                                                                                   | Introduction, page 4  |
| Objectives                   | 3       | State specific objectives, including any prespecified hypotheses                                                                                                                                                                                                                                                                                                                                                                                                       | Introduction, pages 4 |
| <b>Methods</b>               |         |                                                                                                                                                                                                                                                                                                                                                                                                                                                                        |                       |
| Study design                 | 4       | Present key elements of study design early in the paper                                                                                                                                                                                                                                                                                                                                                                                                                | Methods, pages 5-6    |
| Setting                      | 5       | Describe the setting, locations, and relevant dates, including periods of recruitment, exposure, follow-up, and data collection                                                                                                                                                                                                                                                                                                                                        | Methods, pages 5-6    |
| Participants                 | 6       | (a) <i>Cohort study</i> —Give the eligibility criteria, and the sources and methods of selection of participants. Describe methods of follow-up<br><i>Case-control study</i> —Give the eligibility criteria, and the sources and methods of case ascertainment and control selection. Give the rationale for the choice of cases and controls<br><i>Cross-sectional study</i> —Give the eligibility criteria, and the sources and methods of selection of participants | Methods, page 5-6     |
|                              |         | (b) <i>Cohort study</i> —For matched studies, give matching criteria and number of exposed and unexposed<br><i>Case-control study</i> —For matched studies, give matching criteria and the number of controls per case                                                                                                                                                                                                                                                 |                       |
| Variables                    | 7       | Clearly define all outcomes, exposures, predictors, potential confounders, and effect modifiers. Give diagnostic criteria, if applicable                                                                                                                                                                                                                                                                                                                               | Methods, page 5-6     |
| Data sources/<br>measurement | 8*      | For each variable of interest, give sources of data and details of methods of assessment (measurement). Describe comparability of assessment methods if there is more than one group                                                                                                                                                                                                                                                                                   | Methods, pages 5-6    |
| Bias                         | 9       | Describe any efforts to address potential sources of bias                                                                                                                                                                                                                                                                                                                                                                                                              | Not relevant          |
| Study size                   | 10      | Explain how the study size was arrived at                                                                                                                                                                                                                                                                                                                                                                                                                              | Not relevant          |
| Quantitative variables       | 11      | Explain how quantitative variables were handled in the analyses. If applicable, describe which groupings were chosen and why                                                                                                                                                                                                                                                                                                                                           | Methods, page 5       |
| Statistical methods          | 12      | (a) Describe all statistical methods, including those used to control for confounding                                                                                                                                                                                                                                                                                                                                                                                  | Not relevant          |
|                              |         | (b) Describe any methods used to examine subgroups and interactions                                                                                                                                                                                                                                                                                                                                                                                                    | Methods, page 6       |

1  
2  
3  
4  
5  
6  
7  
8  
9  
10  
11  
12  
13  
14  
15  
16  
17  
18  
19  
20  
21  
22  
23  
24  
25  
26  
27  
28  
29  
30  
31  
32  
33  
34  
35  
36  
37  
38  
39  
40  
41  
42  
43  
44  
45  
46  
47  
48  
49  
50  
51  
52  
53  
54  
55  
56  
57  
58  
59  
60

|                   |     |                                                                                                                                                                                                              |                         |
|-------------------|-----|--------------------------------------------------------------------------------------------------------------------------------------------------------------------------------------------------------------|-------------------------|
|                   |     | (c) Explain how missing data were addressed                                                                                                                                                                  | Not relevant            |
|                   |     | (d) <i>Cohort study</i> —If applicable, explain how loss to follow-up was addressed                                                                                                                          | Not relevant            |
|                   |     | <i>Case-control study</i> —If applicable, explain how matching of cases and controls was addressed                                                                                                           |                         |
|                   |     | <i>Cross-sectional study</i> —If applicable, describe analytical methods taking account of sampling strategy                                                                                                 |                         |
|                   |     | (e) Describe any sensitivity analyses                                                                                                                                                                        | Not relevant            |
| <b>Results</b>    |     |                                                                                                                                                                                                              |                         |
| Participants      | 13* | (a) Report numbers of individuals at each stage of study—eg numbers potentially eligible, examined for eligibility, confirmed eligible, included in the study, completing follow-up, and analysed            | Results, page 6-8       |
|                   |     | (b) Give reasons for non-participation at each stage                                                                                                                                                         | Not relevant            |
|                   |     | (c) Consider use of a flow diagram                                                                                                                                                                           | Not relevant            |
| Descriptive data  | 14* | (a) Give characteristics of study participants (eg demographic, clinical, social) and information on exposures and potential confounders                                                                     | Not relevant            |
|                   |     | (b) Indicate number of participants with missing data for each variable of interest                                                                                                                          | Not relevant            |
|                   |     | (c) <i>Cohort study</i> —Summarise follow-up time (eg, average and total amount)                                                                                                                             | Not relevant            |
| Outcome data      | 15* | <i>Cohort study</i> —Report numbers of outcome events or summary measures over time                                                                                                                          | Results, page 6-8       |
|                   |     | <i>Case-control study</i> —Report numbers in each exposure category, or summary measures of exposure                                                                                                         |                         |
|                   |     | <i>Cross-sectional study</i> —Report numbers of outcome events or summary measures                                                                                                                           |                         |
| Main results      | 16  | (a) Give unadjusted estimates and, if applicable, confounder-adjusted estimates and their precision (eg, 95% confidence interval). Make clear which confounders were adjusted for and why they were included |                         |
|                   |     | (b) Report category boundaries when continuous variables were categorized                                                                                                                                    | Not relevant            |
|                   |     | (c) If relevant, consider translating estimates of relative risk into absolute risk for a meaningful time period                                                                                             | Not relevant            |
| Other analyses    | 17  | Report other analyses done—eg analyses of subgroups and interactions, and sensitivity analyses                                                                                                               | Not relevant            |
| <b>Discussion</b> |     |                                                                                                                                                                                                              |                         |
| Key results       | 18  | Summarise key results with reference to study objectives                                                                                                                                                     | Interpretation, page 8  |
| Limitations       | 19  | Discuss limitations of the study, taking into account sources of potential bias or imprecision. Discuss both direction and magnitude of any potential bias                                                   | Limitations, page 10-11 |
| Interpretation    | 20  | Give a cautious overall interpretation of results considering objectives, limitations, multiplicity of analyses, results from similar studies, and other relevant evidence                                   | Conclusion, page 11-12  |

|                  |    |                                                                       |              |
|------------------|----|-----------------------------------------------------------------------|--------------|
| Generalisability | 21 | Discuss the generalisability (external validity) of the study results | Not relevant |
|------------------|----|-----------------------------------------------------------------------|--------------|

---

**Other information**


---

|         |    |                                                                                                                                                               |        |
|---------|----|---------------------------------------------------------------------------------------------------------------------------------------------------------------|--------|
| Funding | 22 | Give the source of funding and the role of the funders for the present study and, if applicable, for the original study on which the present article is based | Page 1 |
|---------|----|---------------------------------------------------------------------------------------------------------------------------------------------------------------|--------|

\*Give information separately for cases and controls in case-control studies and, if applicable, for exposed and unexposed groups in cohort and cross-sectional studies.

**Note:** An Explanation and Elaboration article discusses each checklist item and gives methodological background and published examples of transparent reporting. The STROBE checklist is best used in conjunction with this article (freely available on the Web sites of PLoS Medicine at <http://www.plosmedicine.org/>, Annals of Internal Medicine at <http://www.annals.org/>, and Epidemiology at <http://www.epidem.com/>). Information on the STROBE Initiative is available at [www.strobe-statement.org](http://www.strobe-statement.org).

Confidential

1  
2  
3 **Declarations of interest by members of Health Canada’s Special Advisory Committees**  
4  
5 **and Panels: A Descriptive Study**  
6  
7

8  
9 Joel Lexchin MSc, MD

10  
11 Professor Emeritus

12  
13 School of Health Policy and Management

14  
15 York University

16  
17 *and*

18  
19 Emergency Physician

20  
21 University Health Network

22  
23 *and*

24  
25 Associate Professor

26  
27 Faculty of Medicine

28  
29 University of Toronto

30  
31  
32  
33  
34  
35  
36 Correspondence:

37  
38 Joel Lexchin MD

39  
40 School of Health Policy and Management

41  
42 York University

43  
44 4700 Keele St.

45  
46 Toronto, ON M3J 1P3

47  
48 Tel: 416-964-7186

49  
50 Email: [jlexchin@yorku.ca](mailto:jlexchin@yorku.ca)

51  
52 ORCID ID: 0000-0001-5120-8029

53  
54  
55  
56  
57  
58  
59 **Funding:** There was no funding associated with this study.  
60

**Competing interests:**

In 2015-2018, Joel Lexchin was a paid consultant on three projects: one looking at indication-based prescribing (United States Agency for Healthcare Research and Quality), a second to develop principles for conservative diagnosis (Gordon and Betty Moore Foundation) and a third deciding what drugs should be provided free of charge by general practitioners (Government of Canada, Ontario Supporting Patient Oriented Research Support Unit and the St Michael's Hospital Foundation). He also received payments for being on a panel that discussed a pharmacare plan for Canada (Canadian Institute, a for-profit organization), a panel at the American Diabetes Association, a talk at the Toronto Reference Library and writing a brief for a law firm on the effects of promotion on prescribing. He is currently a member of research groups that are receiving money from the Canadian Institutes of Health Research and the Australian National Health and Medical Research Council. He is member of the Foundation Board of Health Action International and the Board of Canadian Doctors for Medicare.

## Abstract

### Background

Health Canada supplements its in-house expertise on pharmacotherapy and pharmaceutical policy through the use of Scientific/Expert Advisory Committees (SAC) and Scientific/Expert Advisory Panels (SAP). This study was undertaken to examine the declared interests of Health Canada committee and panel members.

### Methods

Observational study of the financial and intellectual interests of members of SACs and SAPs. The following information was extracted from Health Canada websites: name, name of committee/panel, direct, indirect and intellectual interests. Information extracted about the SAC/SAP included: number of meetings for which record of proceedings was available and topics discussed at meetings.

### Results

There were three SACs and eight SAPs. Out of 99 people making declarations there were only 12 with a direct financial interest on 5 SACs/SAPs. Six of the 11 SACs/SAPs had a majority of members with an indirect financial interest and nine had a majority of members with an intellectual interest. SAC and SAP meetings rarely discussed individual products but recommendations from all but one of the meetings could potentially have affected the sales of medications.

### Interpretation

Only a minority of members of committees and panels have direct financial interests but the majority of members on a majority of committees had indirect financial and intellectual interests. It was not possible to determine if financial or intellectual interests influenced voting patterns.



## Introduction

Health Canada supplements its in-house expertise on pharmacotherapy and pharmaceutical policy through the use of Scientific/Expert Advisory Committees (SAC) and Scientific/Expert Advisory Panels (SAP). SACs “are standing committees that provide on-going medical/technical/scientific advice and recommendations on regulatory issues for drugs and medical devices in specific therapeutic areas or classes” (1). Health Canada uses ad hoc SAPs “to provide medical/technical/scientific advice and recommendations on specific drug and medical device issues” (2). People interested in serving on a committee or a panel fill out an on-line application form listing their qualifications and expertise (3) and Health Canada chooses members from this list for its various committees and panels.

In order for individuals to be considered for appointment to committees or panels, Health Canada requires them to complete the *Affiliations and Interests Declaration Form for Advisory Body Members* and disclose all affiliations and interests, including any direct financial interest of relevance to the mandate of the committee or panel. People with a direct financial interest in the outcome of a review of a product cannot be a committee or panel member when its mandate is solely to provide advice on specific matters relating to the review, but can be members if the broader mandate encompasses matters of policy, management or program development. In addition to direct financial interests, potential committee and panel members have to disclose indirect financial interests, intellectual interests and “other” interests (4).

In the United States, conflicts of interest are associated with the voting patterns of members of Food and Drug Administration (FDA) advisory committees (5). Whether the same applies

1  
2  
3 to Canada is not known. This study was undertaken to examine the declared interests of  
4  
5 Health Canada committee and panel members.  
6  
7  
8  
9

## 10 **Methods**

### 11 *Source of data*

12  
13 Health Canada treats completed *Affiliation and Interest Declaration Form for Advisory Body*  
14  
15 *Members* (6) as confidential, but does make public a *Summary of Expertise, Experience, and*  
16  
17 *Affiliations and Interests* for individual members of currently active SACs and SAPs  
18  
19 (7). Questions about direct financial interests on the *Affiliation and Interest Declaration*  
20  
21 *Form for Advisory Body Members* ask the respondent to name the company and the type of  
22  
23 interest but not the monetary value. Questions about indirect financial interests on the same  
24  
25 form ask the respondent to name the company and the approximate amount of money  
26  
27 received. Information about company names, the type of interest and its monetary value are  
28  
29 not reported in the *Summary of Expertise, Experience, and Affiliations and Interests*.  
30  
31  
32  
33  
34  
35  
36  
37

38 For each active SAC and SAP, the following information was extracted for each member:  
39  
40 name, name of committee/panel, perspective/sector, declaration of interests in each of the  
41  
42 four categories listed in Table 1. Information extracted about the SAC/SAP included: name  
43  
44 of chair, date of terms of reference, number of meetings, number and date of meetings for  
45  
46 which a record of proceedings was available, topics discussed at meetings and  
47  
48 recommendations from the SAC/SAP. A second person, CO, a retired family physician,  
49  
50 verified the extracted data and differences were resolved by discussion. Information was  
51  
52 current as of December 15, 2018 the date of data collection.  
53  
54  
55  
56  
57

### 58 *Data analysis*

1  
2  
3 For the purposes of analysis, the three different types of indirect financial interests were  
4 combined into one category as were the three different types of intellectual interests.  
5  
6 Descriptive data is reported as counts: the number of individual committee and panel  
7  
8 members, the number of SACs/SAPs, the number and types of interests of each of the  
9  
10 members on individual SACs/SAPs and their perspective/sector. Because the chairs of  
11  
12 SACs/SAPs may have more influence than regular panel members the number and type of  
13  
14 their interest declarations were analyzed separately. The topics discussed in the SAC/SAP  
15  
16 meetings and the recommendations from the SACs/SAPs about those topics are also reported.  
17  
18  
19  
20  
21  
22  
23

### 24 *Ethics approval*

25  
26 All data was publicly available and no patients were involved, therefore ethics approval was  
27  
28 not sought.  
29  
30  
31  
32

### 33 **Results**

34  
35 There were three active SACs and eight active SAPs. Information about all four types of  
36  
37 interests (direct and indirect financial, intellectual and other) was available for all 81 unique  
38  
39 individuals who were members of these SACs and SAPs as of December 15, 2018. Sixty-  
40  
41 nine sat on a single SAC/SAP, seven on two, four on three and one on four SACs/SAPs. In  
42  
43 total there were 99 unique declarations of interests. There were also seven inactive SACs –  
44  
45 four had completed their mandate and three had been cancelled (8) and 10 SAPs that had  
46  
47 completed their mandate (9.) Health Canada does not provide a list of the membership of  
48  
49 these inactive committees and panels. People who sat on more than one SAC/SAP sometimes  
50  
51 made different declarations of interest. Health Canada does not give the dates when the  
52  
53 declarations were made. (Supplementary File 1 available on request from the author contains  
54  
55 the complete dataset for this study.)  
56  
57  
58  
59  
60

1  
2  
3  
4  
5  
6 SACs and SAPs had between 4 and 21 members. Out of 99 declarations there were only 12  
7  
8 for direct financial interest on 5 SACs/SAPs. The maximum percent of members on a  
9  
10 SAC/SAP with a direct financial interest was 30.8%, while six SACs/SAPs had no members  
11  
12 with a direct financial interest. In contrast, six of the 11 SACs/SAPs had a majority of  
13  
14 members with an indirect financial interest and nine had a majority of members with an  
15  
16 intellectual interest. Six SACs/SAPs had more members with an intellectual interest than with  
17  
18 an indirect financial interest and two had an equal number of people with both. Five  
19  
20 SACs/SAPs had a minority of members with either a direct or indirect financial interest, but  
21  
22 none had an entire membership that was free of any type of financial interest. Only one  
23  
24 SAC/SAP had a minority of members with intellectual interests. There was a total of six  
25  
26 “other” interests declared (Table 2). The exact nature of these interests was not clear.  
27  
28  
29  
30  
31  
32

33 Forty-one of the 53 declarations from SAC members listed their sector/perspective as  
34  
35 academia alone or academia with an additional sector. Seven of the remaining 12 listed health  
36  
37 professional. Declarations from SAP members listed academia alone or academia with an  
38  
39 additional sector 26 out of 46 times and health professional only was listed 10 times. There  
40  
41 were only 5 members in total who were from the public/consumer/patient sector and only 2  
42  
43 solely from industry (Table 3).  
44  
45  
46  
47  
48

49 Only one chair had a direct financial interest whereas eight out of 11 had an indirect financial  
50  
51 interest and a similar number had an intellectual interest (data not shown).  
52  
53  
54  
55

56 Health Canada does not require the disclosure of the names of companies that members have  
57  
58 interests with, the amount of money that they received from companies, nor the undertakings  
59  
60

1  
2  
3 that they have with particular companies. The one partial exception is that members have to  
4  
5 declare the value of materials, discounted products, gifts, or other benefits, or travel and  
6  
7 accommodation costs if the amount exceeds \$1,000.  
8  
9

10  
11  
12 The 11 SACs/SAPs had a total of 30 meetings (range 1 to 11) but a record of proceedings is  
13  
14 only available for 10 meetings. These meetings only discussed two specific products  
15  
16 (Diclectin and isotretinoin). Table 4 presents the recommendations from the committees and  
17  
18 panels. Some recommendations, such as the one not to change the labelling for Diclectin,  
19  
20 could have had a positive effect on sales whereas others, such as adding warnings about  
21  
22 fluoroquinolones, could have had a negative effect. The votes of individual members are not  
23  
24 recorded so it is not possible to determine how members with and without different types of  
25  
26 conflicts voted.  
27  
28  
29  
30  
31  
32

### 33 **Interpretation**

34  
35 Only a minority of members of committees and panels have direct financial interests. Indirect  
36  
37 financial interests are much more prevalent than direct interests on SACs/SAPs and the  
38  
39 majority of committees and panels had a majority of members with indirect interests.  
40  
41 Similarly, only a minority of chairs had a direct financial interest, but the majority had  
42  
43 indirect financial interests. Individuals with intellectual interests were more common than  
44  
45 individuals with financial interests on most committees and panels. Differences in  
46  
47 declarations by people serving on multiple committees might be a consequence of making  
48  
49 declarations at different times but since Health Canada does not give the dates of the  
50  
51 declarations this hypothesis cannot be further investigated.  
52  
53  
54  
55  
56  
57  
58  
59  
60

1  
2  
3 Health Canada collects information about the names of companies that committee and panel  
4  
5 members have direct and indirect interests with and, in the case of indirect financial interests,  
6  
7 the approximate monetary value of the interest in the *Affiliation and Interest Declaration*  
8  
9 *Form for Advisory Body Members*. However, it does not disclose this information in the  
10  
11 *Summary of Expertise, Experience, and Affiliations and Interests* that appears on its website.  
12  
13  
14 Nor does Health Canada publicly record the votes of individual members. As a result, it is not  
15  
16 possible to determine if direct or indirect financial interests influence voting patterns.  
17  
18  
19 Similarly, intellectual interests cannot be linked with voting patterns.  
20  
21  
22

23  
24 By asking for a declaration of financial and intellectual interests Health Canada seems to be  
25  
26 equating the importance of the two different types. However, their equivalence has been  
27  
28 contested. Bero and Grundy (10) state that there is substantial evidence that financial  
29  
30 conflicts of interest “lead to systematic biases in scientific research at all stages of the  
31  
32 research process” and that focusing on “interests such as personal beliefs, experience, or  
33  
34 intellectual commitments can divert attention from financial conflicts.” In contrast to  
35  
36 financial interests, the training that researchers receive, their institutional setting and prior or  
37  
38 current membership in particular organizations could influence their views about a particular  
39  
40 topic, but as Bero asks “are these really conflicts of interest...or innate characteristics of the  
41  
42 researcher? These...are an inextricable part of the primary interest of conducting research.  
43  
44  
45 Science is not value free and it makes sense to assume that a researcher’s personal  
46  
47 characteristics and experience will influence judgments that must be made in the course of  
48  
49 research” (11). Scientific experts can decline financial interests, but that is not possible with  
50  
51 interests that form part of their personalities. Finally, individual interests can influence views  
52  
53 in multiple directions whereas financial interests exert influence in only a single direction, in  
54  
55 favour of the party that is providing the money.  
56  
57  
58  
59  
60

1  
2  
3  
4  
5  
6 Even the receipt of small amounts of money or the equivalent can affect behaviour. Meals  
7  
8 valued at less than US \$20 are associated with higher prescribing rates for drugs made by the  
9  
10 companies providing the meals (12). Research on voting patterns of people serving on FDA  
11  
12 advisory committees shows an association between having financial ties solely to the firm  
13  
14 sponsoring the drug under question or serving on advisory boards for sponsoring companies  
15  
16 and pro-sponsor bias (5).  
17  
18  
19  
20

21  
22 Experts may not participate on FDA advisory committees if their financial conflict of interest  
23  
24 (COI) is in excess of \$50,000 USD but the FDA grants waivers under one of three conditions:  
25  
26 (i) the COI is unlikely to “affect the integrity of the services,” (ii) the “need for the  
27  
28 individual’s services outweighs the potential for a COI,” or (iii) they will contribute  
29  
30 “essential expertise.” The number of waivers granted has been increasing (13). COI  
31  
32 declarations and waivers are publicly available on the FDA website and financial COI is  
33  
34 reported in dollar ranges (e.g., \$0-5,000, \$5,001-10,000) (14). The FDA can also exclude  
35  
36 people from serving on committees for intellectual conflicts (15). The chair, members and  
37  
38 expert advisors of the Commission on Human Medicines (CHM) of the United Kingdom’s  
39  
40 Medicines and Healthcare products Regulatory Agency are governed by a 2006 Code of  
41  
42 Practice which requires each member to make an annual declaration of interests in the  
43  
44 pharmaceutical industry and the declarations are published annually (16). In Canada, the  
45  
46 Canadian Agency for Drugs and Technology in Health (CADTH) requires expert committee  
47  
48 and panel members to declare direct and indirect financial interests and intellectual interests.  
49  
50 A summary of the member’s expertise, experience, affiliations and conflict of interest  
51  
52 declarations is posted and publicly available on the CADTH website. The declaration form  
53  
54 asks members for the name of the party that they have a conflict with and for the monetary  
55  
56  
57  
58  
59  
60

1  
2  
3 value of the benefit in dollar ranges (e.g., \$0-5,000, \$5,001-10,000) (17). Company names are  
4  
5 disclosed on the website but not the monetary value of the benefits.  
6  
7  
8  
9

### 10 *Limitations*

11  
12 The committees and panels that were examined are only a minority of the ones that Health  
13  
14 Canada has used and whether the results of this study can be applied to inactive SACs/SAPs  
15  
16 is unknown. The interests that were declared by individual members and reported in the  
17  
18 *Summary of Expertise, Experience, and Affiliations and Interests* could not be verified by  
19  
20 independent searching since not enough detail was provided in the declarations on the Health  
21  
22 Canada web site. Some members may have undeclared direct and indirect financial interests  
23  
24  
25  
26 (18).  
27  
28  
29  
30

31 The three types of indirect financial interests were combined into a single category since it  
32  
33 was not possible to link interests with particular companies to individual members' voting  
34  
35 patterns. Different types of intellectual interests were combined for a similar reason.  
36  
37 Disaggregating indirect financial interests and intellectual interests could provide important  
38  
39 information about individuals voting patterns once the disaggregated information is available.  
40  
41  
42  
43  
44

### 45 **Conclusion**

46  
47 Indirect financial interests and intellectual interests are widespread on SACs and SAPs.  
48  
49 Biases in voting as a result of interests could influence sales of products. The Institute of  
50  
51 Medicine (now the National Academy of Medicine) in its report on conflict of interest in  
52  
53 guidelines recommends that the chair of any panel should be free of all conflicts as should the  
54  
55 majority of members on the panel (19). There are differences between clinical practice  
56  
57 guideline committees and SACs/SAPs, but they are both expected to produce unbiased  
58  
59  
60



1  
2  
3 information. Health Canada should follow the IOM recommendations in constituting its  
4 SACs/SAPs. Health Canada should also publicly release all of the information about direct  
5 and indirect financial interests that is on the *Affiliation and Interest Declaration Form for*  
6 *Advisory Body Members* along with the date when the declarations were made.  
7  
8  
9  
10  
11  
12

13  
14 In addition, the Canadian government could supplement the information that individual  
15 experts report by emulating the United States and requiring companies to report all transfers  
16 of value to doctors (20) and other regulated healthcare professionals. This change would help  
17 to ensure that all financial conflicts are disclosed. (Some of the committee and panel  
18 members are not regulated healthcare professionals and therefore this reporting requirement  
19 would not cover their interactions with industry.)  
20  
21  
22  
23  
24  
25  
26  
27  
28  
29  
30

31 In order to be able to see if there are changing patterns in the declarations of experts, Health  
32 Canada should make available lists of the membership of inactive committees and panels and  
33 their declarations on a publicly available web site.  
34  
35  
36  
37  
38  
39

40 Finally, Health Canada should record the votes of individual committee and panel members  
41 so that voting patterns can be linked to different types of financial interests with particular  
42 companies and with different types of intellectual interests.  
43  
44  
45  
46  
47  
48  
49  
50  
51  
52  
53  
54  
55  
56  
57  
58  
59  
60

## References

1. Government of Canada. Scientific/expert advisory committees 2011 [Available from: <https://www.canada.ca/en/health-canada/services/drugs-health-products/drug-products/scientific-expert-advisory-committees.html>].
2. Government of Canada. Scientific/expert advisory panels 2011 [Available from: <https://www.canada.ca/en/health-canada/services/drugs-health-products/drug-products/scientific-expert-advisory-panels.html>].
3. Government of Canada. Scientific experts database 2018 [Available from: <https://erci-iace.hc-sc.gc.ca/erci-iace/index-eng.jsp>].
4. Health Products and Food Branch. Guidance on advisory bodies Ottawa: Health Canada; 2007 [Available from: [http://publications.gc.ca/collections/collection\\_2014/sc-hc/H164-172-2007-eng.pdf](http://publications.gc.ca/collections/collection_2014/sc-hc/H164-172-2007-eng.pdf)].
5. Pham-Kanter G. Revisiting financial conflicts of interest in FDA advisory committees. *Milbank Quarterly*. 2014;92:446-70.
6. Health Canada. Affiliations and interests declaration nd [Available from: <https://www.canada.ca/content/dam/hc-sc/documents/services/chemical-substances/chemicals-management-plan/form-affil-form-eng.pdf>].
7. Government of Canada. Drug products 2018 [Available from: <https://www.canada.ca/en/health-canada/services/drugs-health-products/drug-products.html>].
8. Government of Canada. Completed or active - scientific advisory bodies 2017 [Available from: <https://www.canada.ca/en/health-canada/services/drugs-health-products/drug-products/scientific-expert-advisory-committees/completed-active.html>].
9. Government of Canada. Scientific advisory bodies 2012 [Available from: <https://www.canada.ca/en/health-canada/services/drugs-health-products/drug-products/scientific-expert-advisory-panels/scientific-advisory-bodies.html>].

- 1  
2  
3 10. Bero L, Grundy Q. Why having a (nonfinancial) interest is not a conflict of interest.  
4  
5 PLoS Biology. 2016;14:e2001221.  
6  
7
- 8 11. Bero L. What is in a name? Nonfinancial influences on the outcomes of systematic  
9  
10 reviews and guidelines. Journal of Clinical Epidemiology. 2014;67:1239-41.  
11
- 12 12. DeJong C, Aguilar T, Tseng C-W, Lin W, Boscardin W, Dudley R. Pharmaceutical  
13  
14 industry-sponsored meals and physician prescribing patterns for Medicare beneficiaries.  
15  
16 JAMA Internal Medicine. 2016;176:1114-22.  
17
- 18 13. Wood S, Mador J. Uncapped conflict of interest? Science. 2013;340:1172-3.  
19
- 20 14. Administration USDoHaHSFaD. Guidance for the public, FDA advisory committee  
21  
22 members, and FDA staff: public availability of advisory committee members' financial  
23  
24 interest information and waivers: final guidance Rockville Maryland2014 [Available from:  
25  
26 <https://www.fda.gov/downloads/regulatoryinformation/guidances/ucm295372.pdf>.  
27  
28
- 29 15. Lenzer J. When is a point of view a conflict of interest? BMJ. 2016;355:i6194.  
30
- 31 16. Medicines & Healthcare products Regulatory Agency. Code of practice for chairmen  
32  
33 and members of the Commission on Human Medicines, certain committees and expert  
34  
35 advisory groups and [Available from:  
36  
37 [https://assets.publishing.service.gov.uk/government/uploads/system/uploads/attachment\\_data](https://assets.publishing.service.gov.uk/government/uploads/system/uploads/attachment_data/file/440853/CHM_code_of_practice.pdf)  
38  
39 [/file/440853/CHM\\_code\\_of\\_practice.pdf](https://assets.publishing.service.gov.uk/government/uploads/system/uploads/attachment_data/file/440853/CHM_code_of_practice.pdf).  
40  
41  
42  
43
- 44 17. Canadian Agency for Drugs and Technology in Health. Conflict of interest guidelines  
45  
46 for CADTH expert committee and panel members and [Available from:  
47  
48 [https://www.cadth.ca/sites/default/files/corporate/corp\\_committees/](https://www.cadth.ca/sites/default/files/corporate/corp_committees/cadth_coi_guidelines_cedc_members_e.pdf)  
49  
50 [cadth\\_coi\\_guidelines\\_cedc\\_members\\_e.pdf](https://www.cadth.ca/sites/default/files/corporate/corp_committees/cadth_coi_guidelines_cedc_members_e.pdf).  
51  
52
- 53 18. Khan R, Scaffidi M, Rumman A, Grindal A, Plener I, Grover S. Prevalence of  
54  
55 financial conflicts of interest among authors of clinical guidelines related to high-revenue  
56  
57 medications. JAMA Internal Medicine. 2018;178:1712-5.  
58  
59  
60

1  
2  
3 19. IOM (Institute of Medicine). Clinical practice guidelines we can trust. Washington,  
4 DC; 2011.  
5

6  
7  
8 20. Rosenthal M, Mello M. Sunlight as disinfectant - new rules on disclosure of industry  
9 payments to physicians. New England Journal of Medicine. 2013;368:2052-4.  
10  
11  
12  
13  
14  
15  
16  
17  
18  
19  
20  
21  
22  
23  
24  
25  
26  
27  
28  
29  
30  
31  
32  
33  
34  
35  
36  
37  
38  
39  
40  
41  
42  
43  
44  
45  
46  
47  
48  
49  
50  
51  
52  
53  
54  
55  
56  
57  
58  
59  
60

Confidential

**Table 1: Description of conflicts of interest**

| <b>Type of conflict</b>      | <b>Description</b>                                                                                                                                                                                                                                                               |
|------------------------------|----------------------------------------------------------------------------------------------------------------------------------------------------------------------------------------------------------------------------------------------------------------------------------|
| Direct financial interests   | Current employment, investments in companies, partnerships, equity, royalties, joint ventures, trusts, real property, stocks, shares or bonds, with the regulated industry                                                                                                       |
| Indirect financial interests | Within the past five years, payment from regulated industry for work done or being done, including past employment, contracts or consulting; or financial support including research support, personal education grants, contributions, fellowships, sponsorships, and honoraria |
|                              | Within the past five years, materials, discounted products, gifts, or other benefits, or attendance at meetings where all or part of the travel and accommodation costs were provided by the regulated industry                                                                  |
|                              | Within the last three years, grants or other funding from the regulated industry to any of the organizations where you are currently employed or participate in internal decision making                                                                                         |
| Intellectual interests       | Within the last five years, any formal advice or opinion to industry, a government organization or a non-government organization on a matter of relevance to the Scientific Advisory Committee or Scientific Advisory Panel                                                      |
|                              | Within the last five years, any published or publicly stated point of view on issues of relevance to the Scientific Advisory Committee or Scientific Advisory Panel mandate                                                                                                      |
|                              | Current professional or volunteer affiliations such as membership of professional societies, lobbying, public interest or advocacy groups, of relevance to the Scientific Advisory Committee or Scientific Advisory Panel                                                        |
| Other interests              | Any other affiliations and interests or potential circumstances that might give a well-informed member of the public reasonable grounds for concern regarding the integrity and objectivity of your participation                                                                |

**Table 2: Number (percent) of committee/panel members with various types of interest**

| <b>Title</b>                                                  | <b>Committee/<br/>Panel</b> | <b>Total<br/>number<br/>of<br/>members</b> | <b>Direct<br/>financial<br/>interest</b> | <b>Indirect<br/>financial<br/>interest</b> | <b>Direct or<br/>indirect<br/>financial<br/>interest</b> | <b>Intellectua<br/>l interest</b> | <b>Other<br/>interests</b> |
|---------------------------------------------------------------|-----------------------------|--------------------------------------------|------------------------------------------|--------------------------------------------|----------------------------------------------------------|-----------------------------------|----------------------------|
| Oncology Therapies                                            | Committee                   | 21                                         | 3 (14.3)                                 | 18 (85.7)                                  | 18 (85.7)                                                | 16 (76.2)                         | 2 (9.5)                    |
| Pharmaceutical Sciences and Clinical Pharmacology             | Committee                   | 13                                         | 4 (30.8)                                 | 9 (69.2)                                   | 10 (76.9)                                                | 12 (92.3)                         | 0 (0)                      |
| Respiratory and Allergy Therapies                             | Committee                   | 19                                         | 3 (15.8)                                 | 14 (73.7)                                  | 14 (73.7)                                                | 16 (84.2)                         | 0 (0)                      |
| Anti-infective Therapies                                      | Panel                       | 6                                          | 1 (16.7)                                 | 2 (33.3)                                   | 2 (33.3)                                                 | 6 (100)                           | 0 (0)                      |
| Bioequivalence Requirements for Gender-Specific Drug Products | Panel                       | 7                                          | 0 (0)                                    | 4 (57.1)                                   | 4 (57.1)                                                 | 6 (85.7)                          | 0 (0)                      |
| Bioequivalence Requirements for Modified-Release Dosage Forms | Panel                       | 6                                          | 0 (0)                                    | 5 (83.3)                                   | 5 (83.3)                                                 | 5 (83.3)                          | 0 (0)                      |
| Diclectin                                                     | Panel                       | 4                                          | 0 (0)                                    | 1 (25.0)                                   | 1 (25.0)                                                 | 1 (25.0)                          | 0 (0)                      |
| Opioid Analgesic Abuse                                        | Panel                       | 6                                          | 1 (16.7)                                 | 4 (66.7)                                   | 4 (66.7)                                                 | 4 (66.7)                          | 0 (0)                      |
| Opioid Use and Contraindications                              | Panel                       | 6                                          | 0 (0)                                    | 1 (16.7)                                   | 1 (16.7)                                                 | 6 (100)                           | 2 (33.3)                   |
| Opioids                                                       | Panel                       | 6                                          | 0 (0)                                    | 2 (33.3)                                   | 2 (33.3)                                                 | 6 (100)                           | 2 (33.3)                   |

|                              |       |   |       |          |          |          |       |
|------------------------------|-------|---|-------|----------|----------|----------|-------|
| Isotretinoin Risk Management | Panel | 5 | 0 (0) | 2 (40.0) | 2 (40.0) | 3 (60.0) | 0 (0) |
|------------------------------|-------|---|-------|----------|----------|----------|-------|

Confidential

1  
2  
3  
4  
5  
6  
7  
8  
9  
10  
11  
12  
13  
14  
15  
16  
17  
18  
19  
20  
21  
22  
23  
24  
25  
26  
27  
28  
29  
30  
31  
32  
33  
34  
35  
36  
37  
38  
39  
40  
41  
42  
43  
44  
45  
46

**Table 3: Sector/perspective of Special Advisory Committee/Special Advisory Panel members\***

|                                   | Academia      |                       |                                  |           |           | Health professional      |           | Industry | Infectious disease | Pharmacy | Public/<br>consumer/<br>patient |
|-----------------------------------|---------------|-----------------------|----------------------------------|-----------|-----------|--------------------------|-----------|----------|--------------------|----------|---------------------------------|
|                                   | Academia only | + Health professional | + Health professional + Research | +Industry | +Research | Health professional only | +Research |          |                    |          |                                 |
| <b>Special Advisory Committee</b> | 11            | 17                    | 6                                | 1         | 6         | 7                        | 0         | 2        | 0                  | 0        | 3                               |
| <b>Special Advisory Panel</b>     | 10            | 7                     | 4                                |           | 5         | 10                       | 2         | 0        | 5                  | 1        | 2                               |

\*Some people were on more than one committee and/or panel

Confidential



Table 4: Topics discussed at committee/panel meetings

| Committee/<br>panel                            | Number<br>of<br>meetings | Number of<br>meetings<br>where<br>record of<br>proceeding<br>s available | Date of<br>meeting(s)<br>where record<br>of<br>proceedings<br>available† | Summary of<br>topic(s)<br>discussed                                                                                                                                             | Summary of<br>recommendation(s)<br>from SAC* or<br>SAP‡                                                                                                                                                                                                                                                                                                                                                     |
|------------------------------------------------|--------------------------|--------------------------------------------------------------------------|--------------------------------------------------------------------------|---------------------------------------------------------------------------------------------------------------------------------------------------------------------------------|-------------------------------------------------------------------------------------------------------------------------------------------------------------------------------------------------------------------------------------------------------------------------------------------------------------------------------------------------------------------------------------------------------------|
| Oncology<br>therapies<br>SAC                   | 7                        | 1                                                                        | August/September 2011                                                    | <ul style="list-style-type: none"> <li>Regulations prohibiting the use of arsenic as an ingredient in drugs sold for human use</li> </ul>                                       | <ul style="list-style-type: none"> <li>The section of the Food and Drugs Act that prohibits the sale of drugs containing arsenic should be revoked</li> </ul>                                                                                                                                                                                                                                               |
| Respiratory<br>and allergy<br>therapies<br>SAC | 11                       | 3                                                                        | 2012-03-14<br>2013-10-26<br>2018-02-23                                   | <ul style="list-style-type: none"> <li>Data requirements for safety and effectiveness of subsequent market entry inhaled products for use in the treatment of asthma</li> </ul> | <ul style="list-style-type: none"> <li>An in vitro data package is adequate in lieu of clinical data to demonstrate bioequivalence of a subsequent market entry budesonide suspension for inhalation using a suitable nebulizer</li> <li>Depending on the type of product clinical outcome studies using FEV1 are acceptable as long as a difference in the mean of at least 12% is demonstrated</li> </ul> |
| Anti-<br>infective<br>Therapies<br>SAP         | 1                        | 1                                                                        | 2016-10-06                                                               | <ul style="list-style-type: none"> <li>Issues around the safety and efficacy of fluoroquinolones for different indications</li> </ul>                                           | <ul style="list-style-type: none"> <li>The Product Monograph for fluoroquinolones should include a statement about disabling and potentially irreversible persistent adverse reactions</li> </ul>                                                                                                                                                                                                           |

|                                                                   |   |   |            |                                                                                                                                                                                              |                                                                                                                                                                                                                                                                                                                                                                                                       |
|-------------------------------------------------------------------|---|---|------------|----------------------------------------------------------------------------------------------------------------------------------------------------------------------------------------------|-------------------------------------------------------------------------------------------------------------------------------------------------------------------------------------------------------------------------------------------------------------------------------------------------------------------------------------------------------------------------------------------------------|
|                                                                   |   |   |            |                                                                                                                                                                                              | <ul style="list-style-type: none"> <li>Fluoroquinolones should not be used for acute sinusitis of less than 7 days duration</li> </ul>                                                                                                                                                                                                                                                                |
| Bioequivalence requirements for gender-specific drug products SAP | 1 | 1 | 2011-06-22 | <ul style="list-style-type: none"> <li>Requirements for market authorization of a second entry or subsequent entry gender-specific drug product</li> </ul>                                   | <ul style="list-style-type: none"> <li>The current practice of using only males, males and females or only females for bioequivalence studies should be continued</li> </ul>                                                                                                                                                                                                                          |
| Diclectin SAP                                                     | 1 | 1 | 2016-06-02 | <ul style="list-style-type: none"> <li>Data from study of Diclectin</li> </ul>                                                                                                               | <ul style="list-style-type: none"> <li>The panel would not recommend any changes to the current labelling of Diclectin for the management of nausea and vomiting of pregnancy</li> </ul>                                                                                                                                                                                                              |
| Opioid use and contraindications SAP                              | 1 | 1 | 2017-03-24 | <ul style="list-style-type: none"> <li>Information about opioids that should be included in Product Monograph</li> <li>Should low dose codeine products be made prescription-only</li> </ul> | <ul style="list-style-type: none"> <li>Information about a threshold dose for chronic non-cancer pain should be in the Dosing and Administration section of the Product Monograph in such a way as to draw the attention of the prescriber</li> <li>The indication for extended/long-acting opioids should be changed to say that patients should first have tried a non-opioid medication</li> </ul> |

|                                  |   |   |                         |                                                                                                                                                        |                                                                                                                                                                                                                                                                                                              |
|----------------------------------|---|---|-------------------------|--------------------------------------------------------------------------------------------------------------------------------------------------------|--------------------------------------------------------------------------------------------------------------------------------------------------------------------------------------------------------------------------------------------------------------------------------------------------------------|
|                                  |   |   |                         |                                                                                                                                                        | <ul style="list-style-type: none"> <li>• Prescriptions for opioids for acute pain should be limited to 3 days</li> <li>• No changes should be made to the non-prescription status of low dose codeine products at present</li> </ul>                                                                         |
| Opioids SAP                      | 1 | 1 | 2016-11-15 & 2016-11-16 | <ul style="list-style-type: none"> <li>• Public information about opioid overdose and addiction</li> <li>• Risk Management Plan for opioids</li> </ul> | <ul style="list-style-type: none"> <li>• A warning sticker should be placed on prescriptions for opioids to highlight the issues of physical dependence, addiction and overdose</li> <li>• Industry involvement in Risk Management Plans and educational programs should be monitored and limited</li> </ul> |
| Isotretinoin risk management SAP | 1 | 1 | 2017-11-17              | <ul style="list-style-type: none"> <li>• Pregnancy prevention program for isotretinoin</li> </ul>                                                      | <ul style="list-style-type: none"> <li>• While there is no evidence to show that the Canadian pregnancy prevention program is not ineffective improvements should be made</li> </ul>                                                                                                                         |

†Record of proceedings of meeting of Respiratory and Allergy Therapies SAC on 2018-11-02 not available at time of writing

\*Scientific Advisory Committee

‡Scientific Advisory Panel
